# Supplementary material for: PDMS-based microfluidic devices using commoditized PCBs as masters with no specialized equipment required
Source: Royal Society of Chemistry journal article supplement (doi:10.1039/c7ra03899b), 2017-01-01
Supplement: c7ra03899b1.pdf [file c7ra03899b1.pdf]

### Supporting Information

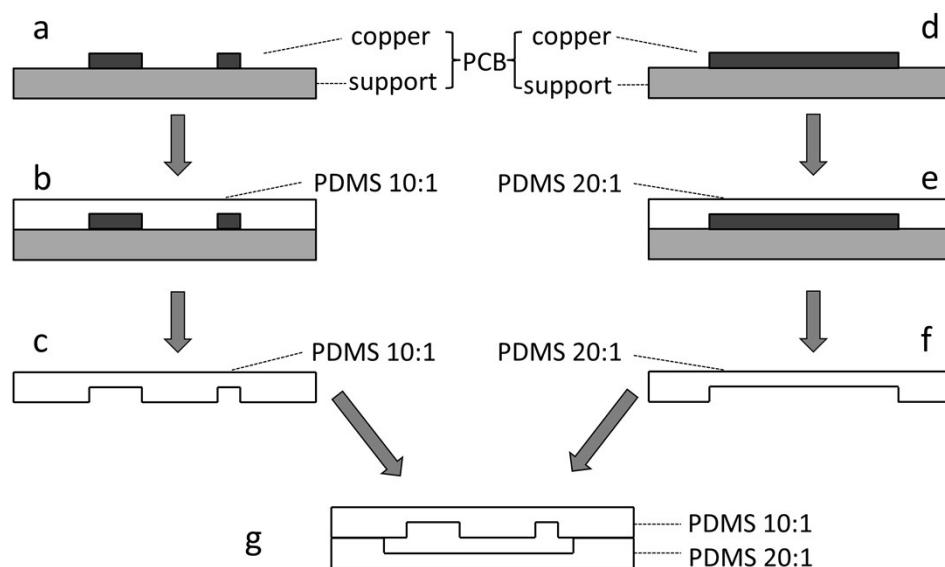

**Fig. S1** Schematic diagram for multi-height device fabricating. (a) Using a commoditized PCB product as master. (b) Pouring degassed PDMS prepolymer (10:1 silicone elastomer with curing agent) over the first PCB master. (c) Peeling off the semi-cured PDMS replica from the first master. (d) Using another commoditized PCB product as master. (e) Pouring degassed PDMS prepolymer (20:1 silicone elastomer with curing agent) over the second PCB master. (f) Peeling off the semi-cured PDMS replica from the second master. (g) Bonding the first replica which is fabricated using 10:1 silicone elastomer with curing agent to the second replica which is fabricated using 20:1 silicone elastomer with curing agent.

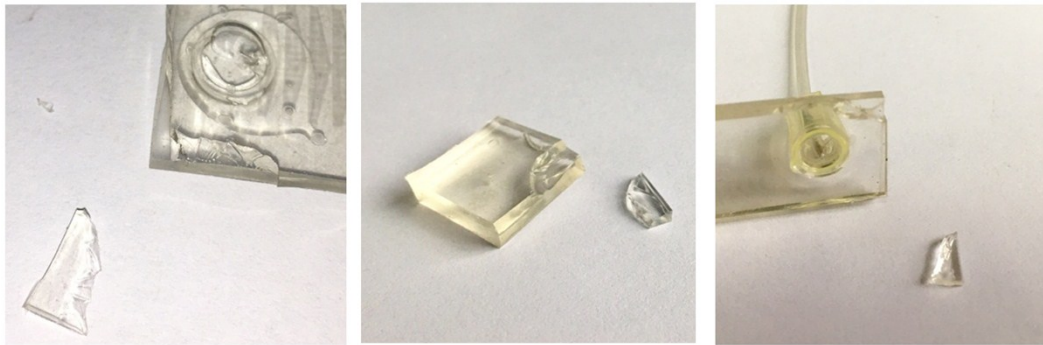

**Fig. S2** Tearing experiments of the sealed PDMS-based microfluidic devices. All fabricated devices cracked within one PDMS layer, instead of splitting along the bonding surfaces.

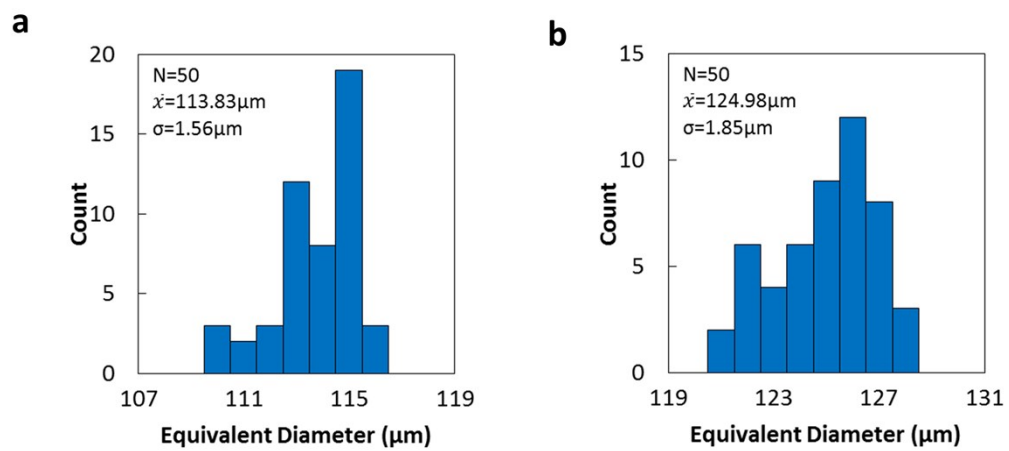

**Fig S3.** Histogram of daughter droplet size distribution. The daughter droplets were formed by the splitting of mother droplets in the symmetrical T-junction. (a) Histogram of the left daughter droplet size distribution. (b) Histogram of the right daughter droplet size distribution.
